# Supplementary material
Source: PubMed Central journal article supplement (PMC8182826)
Supplement: 41433_2020_1036_MOESM1_ESM.pdf [file 41433_2020_1036_MOESM1_ESM.pdf]

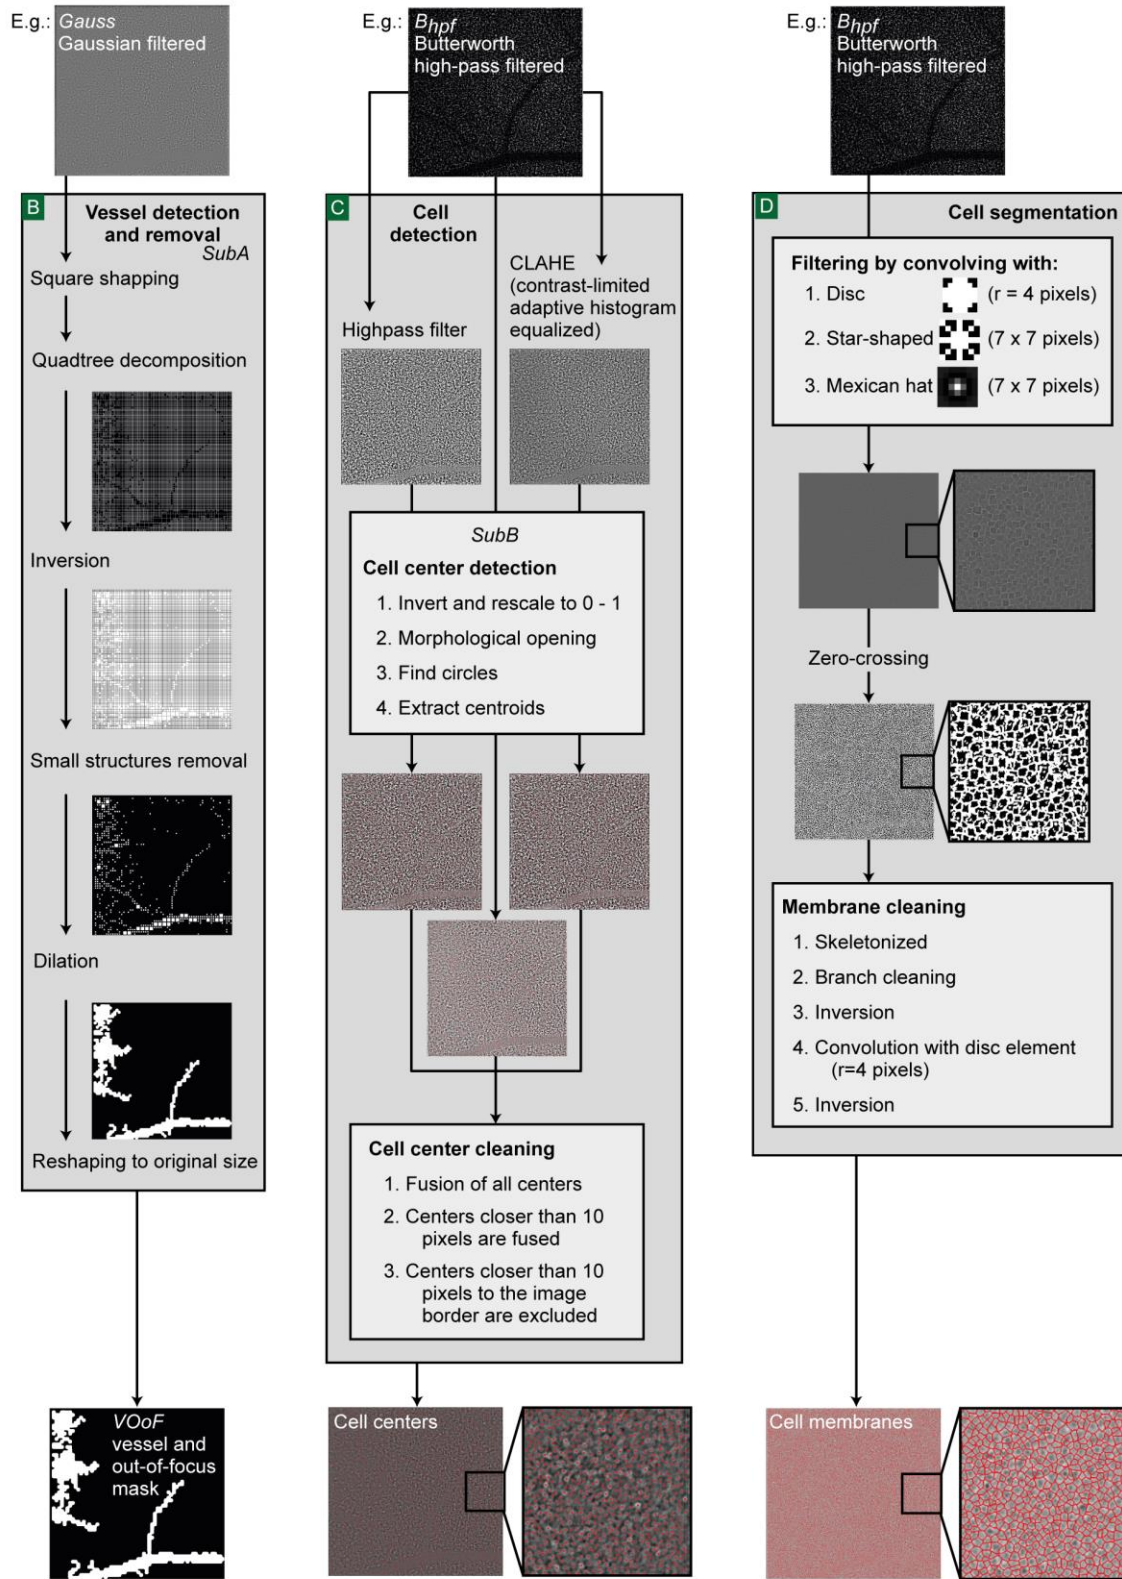

Supplementary Figure 1. Diagrams of processing Blocks B, C, and D. Example input and output maps (3x zoom areas)
