# Supplementary material
Source: PubMed Central journal article supplement (PMC8182826)
Supplement: 41433_2020_1036_MOESM3_ESM.pdf [file 41433_2020_1036_MOESM3_ESM.pdf]

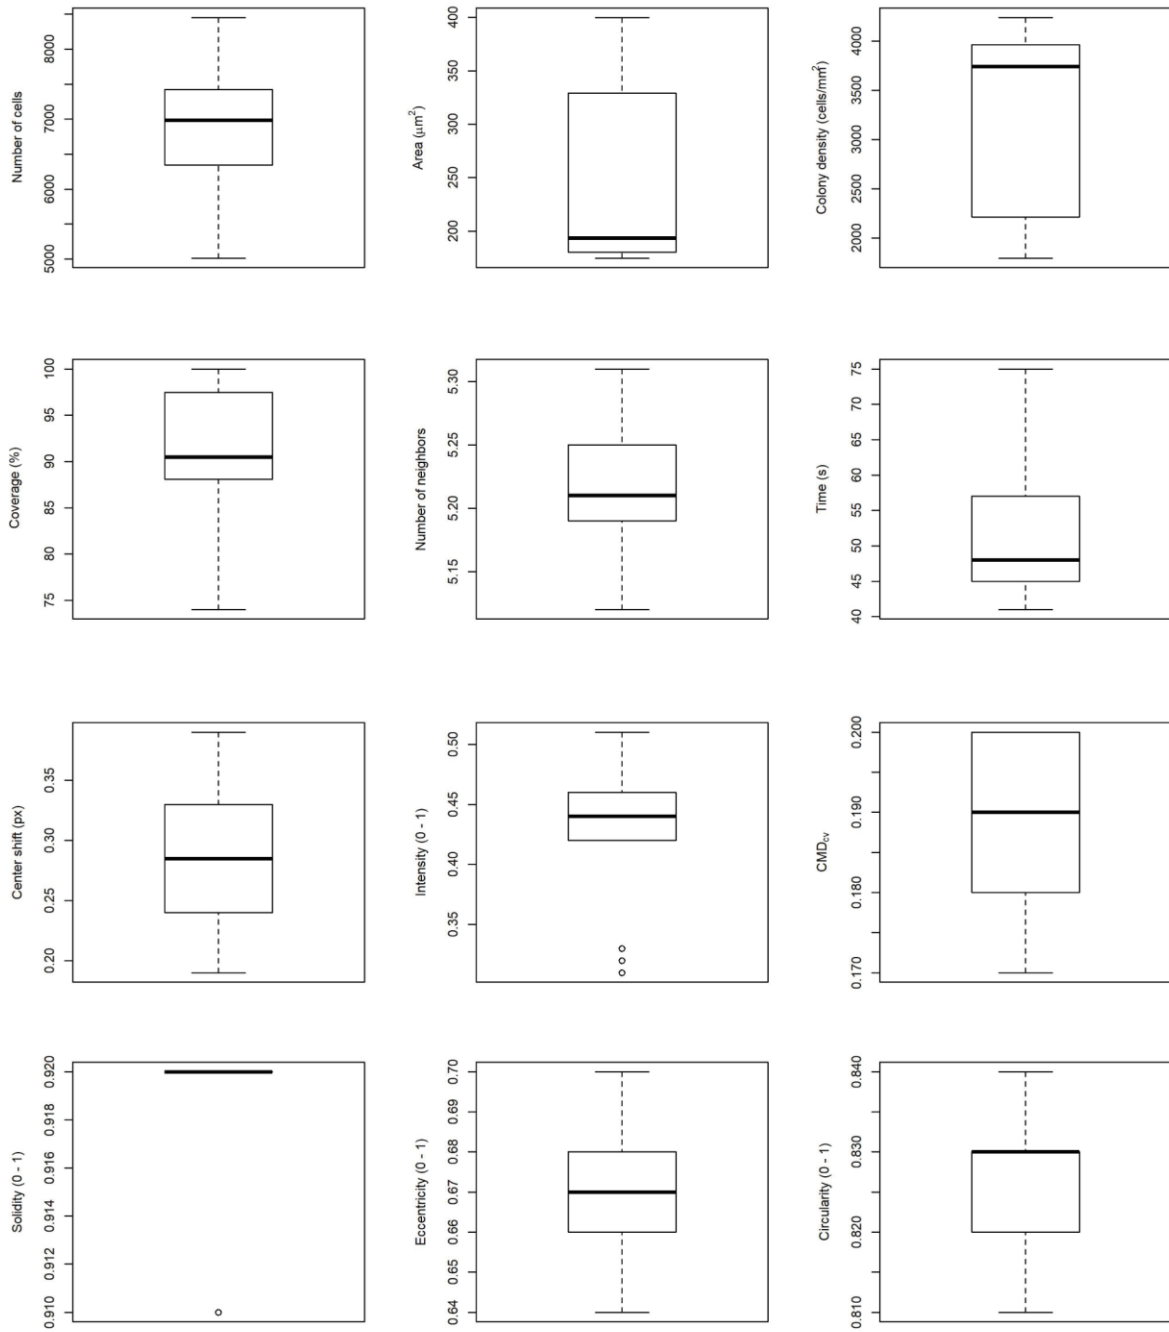

**Supplementary Figure 3.** Boxplot of RPE layer and single cell level characteristics distribution in the dataset ( $N = 14$ ).  $\text{CMD}_{cv}$ : coefficient of variation of RPE cellular membrane mask
