# Supplementary material
Source: PubMed Central journal article supplement (PMC8182826)
Supplement: 41433_2020_1036_MOESM4_ESM.pdf [file 41433_2020_1036_MOESM4_ESM.pdf]

**Supplementary Table 1.** Study population characteristics and imaging parameters.

| Subject | Age | Eccentricity<br>from fovea<br>imaged<br>(degrees) | Eccentricity<br>FOV<br>(degrees) | Digital<br>sampling ( $\mu\text{m}$<br>per pixel) |
|---------|-----|---------------------------------------------------|----------------------------------|---------------------------------------------------|
| 1       | 31  | 6.61                                              | 5                                | 0.73                                              |
| 2       | 31  | 2.50                                              | 5                                | 0.73                                              |
| 3       | 31  | 8.23                                              | 5                                | 0.73                                              |
| 4       | 31  | 8.82                                              | 5                                | 0.73                                              |
| 5       | 49  | 5.94                                              | 5                                | 0.73                                              |
| 6       | 28  | 7.81                                              | 5                                | 0.73                                              |
| 7       | 19  | 4.21                                              | 5                                | 1.00                                              |
| 8       | 21  | 2.82                                              | 5                                | 1.00                                              |
| 9       | 26  | 10.00                                             | 5                                | 0.73                                              |
| 10      | 24  | 13.44                                             | 5                                | 0.73                                              |
| 11      | 25  | 9.44                                              | 5                                | 0.73                                              |
| 12      | 23  | 4.64                                              | 5                                | 1.00                                              |
| 13      | 41  | 9.92                                              | 5                                | 1.00                                              |
| 14      | 30  | 5.04                                              | 5                                | 1.00                                              |

FOV: field of view
