# Supplementary material
Source: PubMed Central journal article supplement (PMC8182826)
Supplement: 41433_2020_1036_MOESM6_ESM.pdf [file 41433_2020_1036_MOESM6_ESM.pdf]

**Supplementary Table 3.** RPE layer and single cell metrics from literature and obtained value ranges.  $CMD_{CV}$ : coefficient of variation of RPE cellular membrane mask

| Metric                          | Reference                                   | Sample type           | Sample source | Reference value             | Obtained values (min – max)      |
|---------------------------------|---------------------------------------------|-----------------------|---------------|-----------------------------|----------------------------------|
| <b>Area</b>                     | Forrester et al. (2016) <sup>21</sup>       | Ex vivo               | Human         | 140 – 840 $\mu\text{m}^2$   | 175 – 400 $\mu\text{m}^2$        |
|                                 | Rangel- Fonseca et al. (2013) <sup>37</sup> | In vivo               | Monkey        | 121 – 216 $\mu\text{m}^2$   |                                  |
| <b>Mean number of neighbors</b> | Bhatia et al. (2016) <sup>7</sup>           | Ex vivo               | Human         | 5.7                         | 5.1 – 5.3                        |
| <b>Circularity</b>              | Bhatia et al. (2016) <sup>7</sup>           | Theoretical / Ex vivo | Human         | Theoretical 0.84            | 0.81 – 0.84                      |
|                                 |                                             |                       | Human         | Experimental 0.74*          |                                  |
| <b>Eccentricity</b>             | Bhatia et al. (2016) <sup>7</sup>           | Ex vivo               | Human         | 0.55*                       | 0.64 – 0.70                      |
| <b>Solidity</b>                 | <i>No reference found to compare to</i>     |                       |               |                             |                                  |
| <b>Colony density</b>           | Panda-Jonas et al. (1996) <sup>40</sup>     | Ex vivo               | Human         | 2940 cells/ $\text{mm}^2$ * | 1797 – 4237 cells/ $\text{mm}^2$ |
|                                 | Besch et al. (2003) <sup>41</sup>           | Ex vivo               | Human         | 5500 cells/ $\text{mm}^2$ * |                                  |
|                                 | Rangel- Fonseca et al. (2013) <sup>37</sup> | In vivo               | Monkey        | 4558 cells/ $\text{mm}^2$ * |                                  |
| <b><math>CMD_{CV}</math></b>    | <i>No reference found to compare to</i>     |                       |               |                             |                                  |
