# Supplementary material
Source: PubMed Central journal article supplement (PMC8182826)
Supplement: 41433_2020_1036_MOESM7_ESM.pdf [file 41433_2020_1036_MOESM7_ESM.pdf]

Supplementary Table 4. RPE layer and single cell characteristics per sample

| Original image                                                                      | Final mask                                                                          | Number of cells | Area ( $\mu\text{m}^2$ ) | Circularity | Eccentricity | Solidity | Intensity | Center shift (pixels) | CMD <sub>cv</sub> | Number of neighbor cells | Colony density (cells / $\mu\text{m}^2$ ) | Coverage (%) | Time (s) |
|-------------------------------------------------------------------------------------|-------------------------------------------------------------------------------------|-----------------|--------------------------|-------------|--------------|----------|-----------|-----------------------|-------------------|--------------------------|-------------------------------------------|--------------|----------|
| 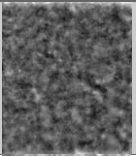   |    | 6,322           | 192                      | 0.83        | 0.66         | 0.92     | 0.48      | 0.24                  | 0.18              | 5.29                     | 3,801                                     | 89           | 45       |
|    |    | 6,565           | 191                      | 0.82        | 0.67         | 0.92     | 0.45      | 0.31                  | 0.19              | 5.26                     | 3,784                                     | 90           | 41       |
|    |    | 6,341           | 189                      | 0.84        | 0.64         | 0.92     | 0.44      | 0.26                  | 0.17              | 5.25                     | 3,875                                     | 91           | 46       |
|   |   | 5,012           | 201                      | 0.83        | 0.66         | 0.92     | 0.33      | 0.28                  | 0.18              | 5.31                     | 3,338                                     | 74           | 57       |
|  |  | 7,789           | 177                      | 0.83        | 0.68         | 0.92     | 0.44      | 0.31                  | 0.19              | 5.21                     | 4,237                                     | 100          | 48       |
|  |  | 7,422           | 178                      | 0.83        | 0.66         | 0.92     | 0.42      | 0.19                  | 0.18              | 5.25                     | 3,961                                     | 83           | 75       |
|  |  | 7,017           | 329                      | 0.82        | 0.69         | 0.91     | 0.31      | 0.28                  | 0.20              | 5.12                     | 2,213                                     | 97           | 48       |
|  |  | 5,718           | 400                      | 0.81        | 0.69         | 0.91     | 0.46      | 0.39                  | 0.20              | 5.25                     | 1,797                                     | 88           | 50       |
|  |  | 6,995           | 195                      | 0.83        | 0.67         | 0.92     | 0.44      | 0.23                  | 0.19              | 5.19                     | 3,701                                     | 87           | 62       |

|                                                                                   |                                                                                   |       |     |      |      |      |      |      |      |      |       |    |    |
|-----------------------------------------------------------------------------------|-----------------------------------------------------------------------------------|-------|-----|------|------|------|------|------|------|------|-------|----|----|
| 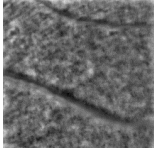 |  | 7,533 | 175 | 0.83 | 0.66 | 0.92 | 0.51 | 0.21 | 0.19 | 5.20 | 4,112 | 90 | 57 |
|  |  | 8,452 | 180 | 0.83 | 0.67 | 0.92 | 0.42 | 0.29 | 0.19 | 5.20 | 4,060 | 94 | 67 |
|  |  | 6,662 | 344 | 0.82 | 0.68 | 0.92 | 0.46 | 0.39 | 0.20 | 5.21 | 2,144 | 98 | 41 |
|  |  | 6,973 | 307 | 0.83 | 0.68 | 0.92 | 0.45 | 0.37 | 0.20 | 5.16 | 2,371 | 98 | 43 |
|  |  | 7,300 | 348 | 0.82 | 0.70 | 0.91 | 0.32 | 0.33 | 0.20 | 5.18 | 2,098 | 96 | 48 |

Final mask: cell masks – green, *VooF* mask – cyan

$CMD_{cv}$ : coefficient of variation of RPE cellular membrane mask

*VooF*: vessel & out-of-focus mask
