# Supplementary material
Source: PubMed Central journal article supplement (PMC8182826)

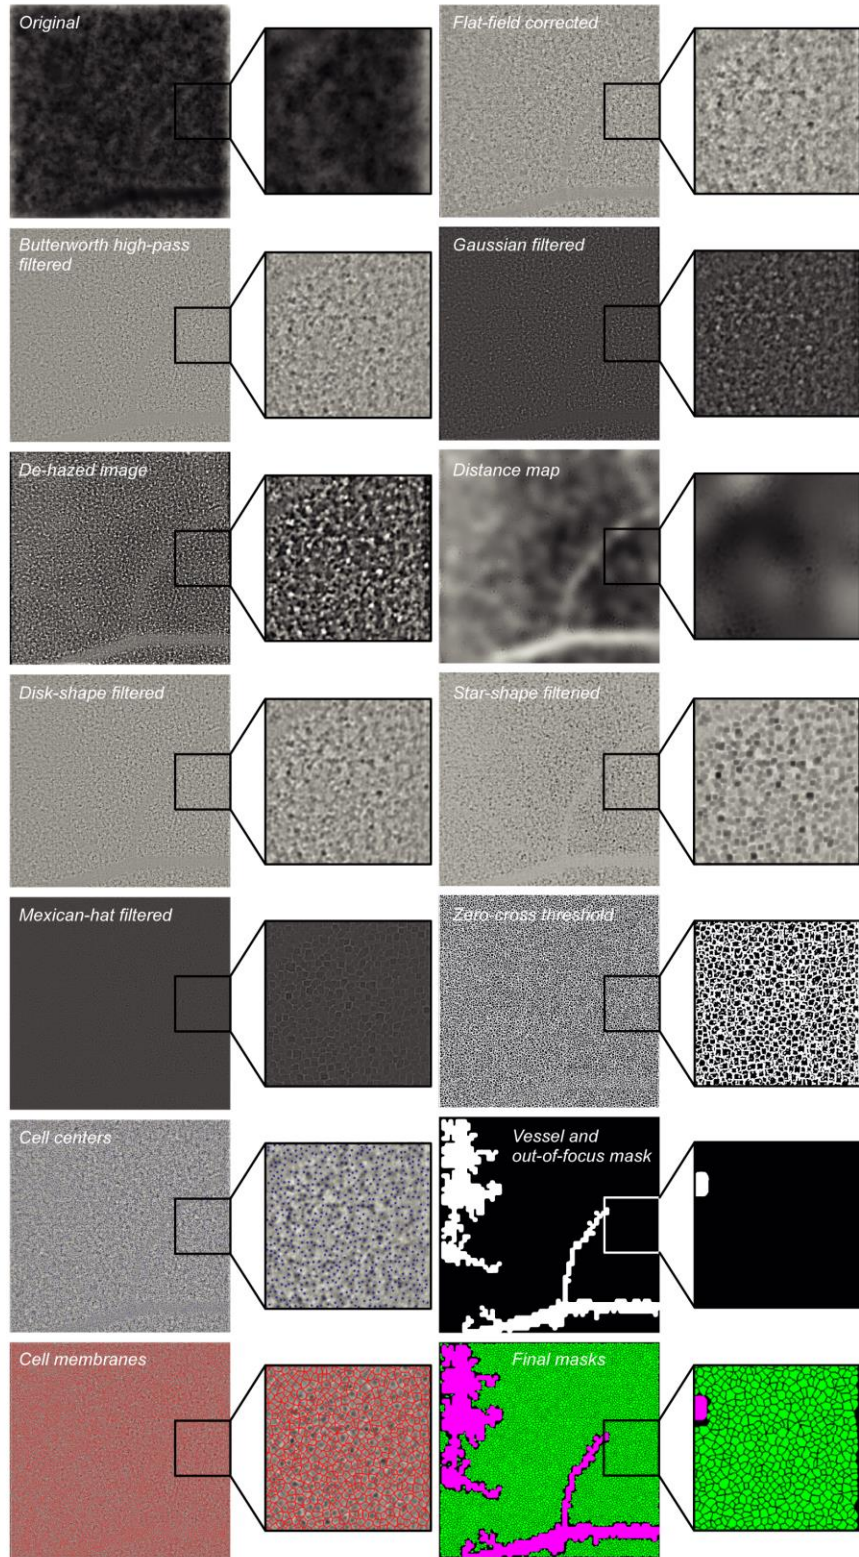

**Supplementary Figure 2.** Sample 6: Image processing intermediate results with zoomed areas (3x zoom).

Supplement: 41433_2020_1036_MOESM2_ESM.pdf [file 41433_2020_1036_MOESM2_ESM.pdf]
